# Supplementary material
Source: Springer Nature journal article supplement (https://www.springermedizin.de/resource/supplementary/12916_2010_328_MOESM4_ESM.pdf/9599646)

**CD34****Lyve-1****Merge**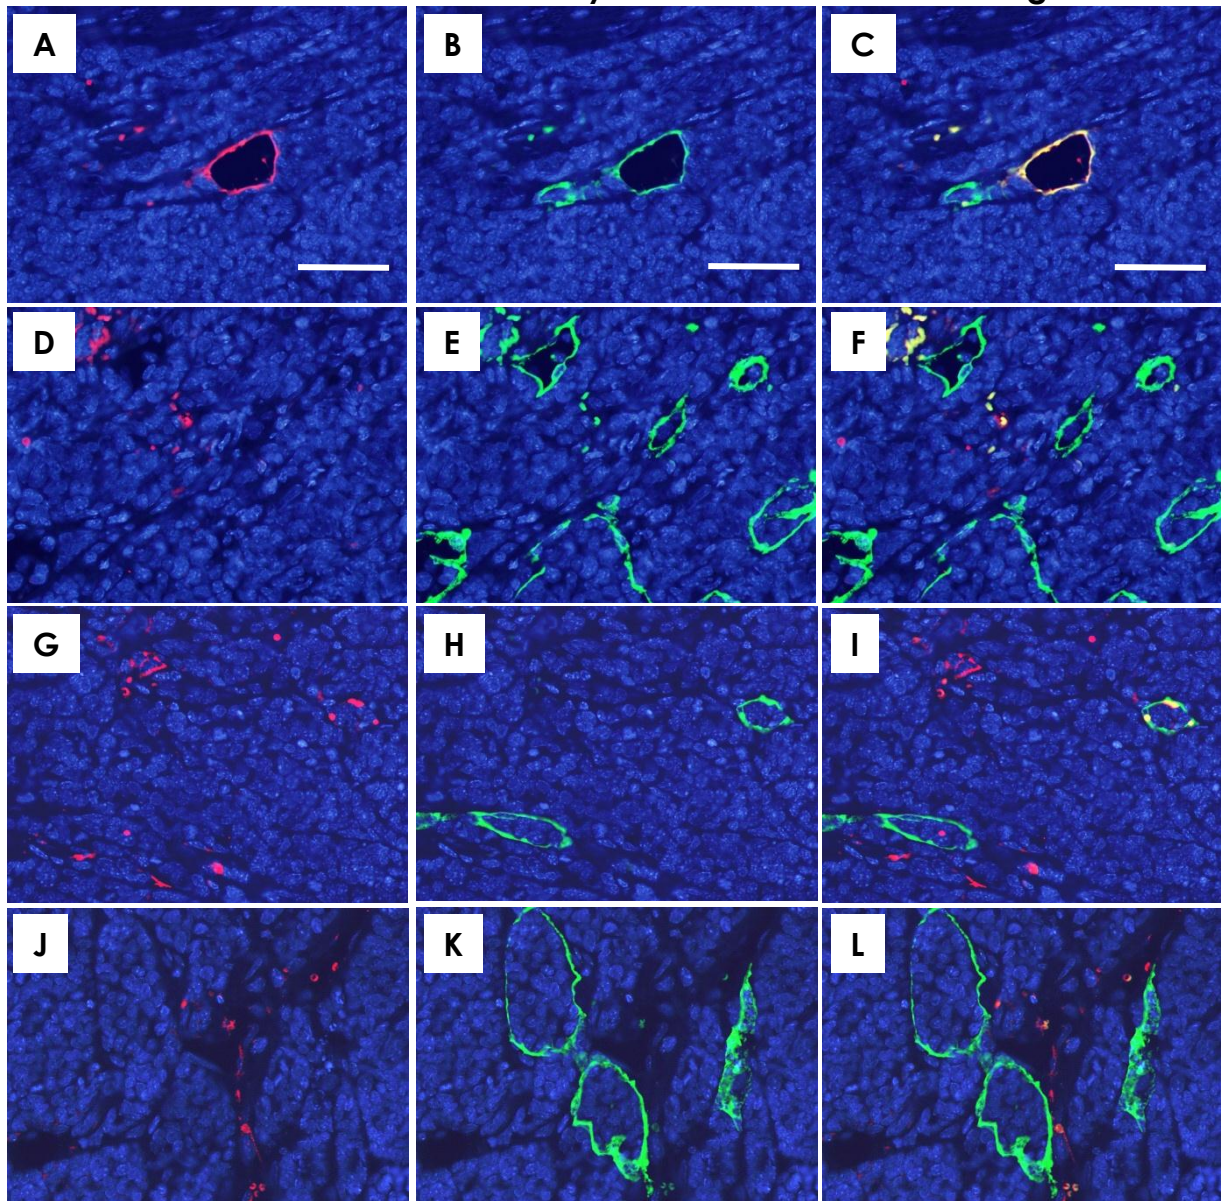

Supplement: MOESM4 [file 9599646]
